# Supplementary material
Source: PubMed Central journal article supplement (PMC3424003)
Supplement: NIHMS383307-supplement-supplemental_info.pdf [file NIHMS383307-supplement-supplemental_info.pdf]

# Supporting Information

Nicholas Leioatts, Tod D. Romo, and Alan Grossfield\*

*Department of Biochemistry & Biophysics, University of Rochester Medical Center, Rochester,  
NY 14642, USA*

E-mail: alan\_grossfield@urmc.rochester.edu

---

\*To whom correspondence should be addressed

In this supplementary document the covariance overlaps, z-scores and spring parameters obtained in our study are reported. We also outline the spring function naming convention in detail. The following is a complete list of spring functions presented in this study. The functional forms replace  $k(R_{ij}^{\circ})$  in Eq. (1), restated here for convenience:

$$U_{ij} = k(R_{ij}^{\circ}) (|R_{ij}| - |R_{ij}^{\circ}|)^2 \quad (\text{S1})$$

The Heaviside step function is defined by:

$$k(R_{ij}^{\circ}) = \begin{cases} 1 & : R_{ij}^{\circ} < R_c \\ 0 & : R_{ij}^{\circ} \geq R_c \end{cases} \quad (\text{S2})$$

In figures referring to an ‘‘exponential’’ spring function the following form is used:

$$k(R_{ij}^{\circ}) = \exp(-aR_{ij}^{\circ}) \quad (\text{S3})$$

The spring can also vary with a power function:

$$k(R_{ij}^{\circ}) = (R_{ij}^{\circ})^{-a} \quad (\text{S4})$$

The functional form developed by Hinsen et al.<sup>24</sup> and referred to as HCA in our text takes the following form:

$$k(R_{ij}^{\circ}) = \begin{cases} a(R_{ij}^{\circ}) + b & : R_{ij}^{\circ} < R_c \\ c(R_{ij}^{\circ})^{-d} & : R_{ij}^{\circ} \geq R_c \end{cases} \quad (\text{S5})$$

The following functional forms rely on chemical information, connecting bonded residues (those neighboring in sequence) and non-bonded residues (all other beads in the system) with separate spring types. In the following functions we label springs with the bonded term followed by the non-bonded term, separated by a colon. A constant stiffness,  $k_1$ , for bonded terms and an

exponentially decaying stiffness for non-bonded terms would be labelled - Constant:Exponential. That function takes the following form:

$$k(R_{ij}^{\circ}) = \begin{cases} k_1 & : \text{Bonded} \\ c \times \exp(-dR_{ij}^{\circ}) & : \text{Non - bonded} \end{cases} \quad (\text{S6})$$

In addition a power function could be used instead of the exponential function. The following form would be labelled Constant:Power:

$$k(R_{ij}^{\circ}) = \begin{cases} k_1 & : \text{Bonded} \\ c(R_{ij}^{\circ})^{-d} & : \text{Non - bonded} \end{cases} \quad (\text{S7})$$

The following functional forms rely on chemical information, connecting bonded residues (those neighboring in sequence), angle residues (second-nearest neighboring in sequence) and non-bonded terms (all others) with three separate spring types. The nomenclature used for these functions is the bonded term, followed by the angle term, followed by the non-bonded term, all separated by colons. The function below is labelled Constant:Constant:Exponential when reported in figures and tables:

$$k(R_{ij}^{\circ}) = \begin{cases} k_1 & : \text{Bonds} \\ k_2 & : \text{Angles} \\ c \times \exp(-dR_{ij}^{\circ}) & : \text{Non - bonded} \end{cases} \quad (\text{S8})$$

Similarly, the function Constant:Constant:Power takes the form:

$$k(R_{ij}^{\circ}) = \begin{cases} k_1 & : \text{Bonds} \\ k_2 & : \text{Angles} \\ c(R_{ij}^{\circ})^{-d} & : \text{Non - bonded} \end{cases} \quad (\text{S9})$$

## Opsin Simulation Details

The opsin data has not been published elsewhere. The starting structure used coordinates obtained from an x-ray crystallographic structure (PDB ID: 3CAP).<sup>1</sup> All waters and fatty acids were removed. Opsin was then embedded in a membrane made of 123 1-stearoyl-2-docosahexaenoyl-phosphatidylethanolamine (SDPE) molecules. The system was hydrated with 8,200 water molecules. We added 15 Na<sup>+</sup> and 19 Cl<sup>-</sup> atoms to neutralize the system and obtain an  $\approx$ 100 mM sodium chloride concentration.

This simulation was performed in NAMD 2.8<sup>2</sup> using the NP $\gamma$ T ensemble, where  $\gamma$  is a 30 dyn/cm surface tension applied laterally to the bilayer. The CHARRM22 forcefield<sup>3,4</sup> was used for the protein and the CHARMM36 forcefield<sup>5</sup> was used for lipids.

The resulting system was then simulated for 472 ns on the University of Rochester's Blue Gene/P using a 2 fs timestep with the RATTLE applied to constrain hydrogen containing bonds to their equilibrium length.<sup>6</sup> The temperature was held at 310K using Langevin dynamics. Electrostatic interactions were computed using the Particle Mesh Ewald method<sup>7-9</sup> with a 75x75x96 grid. Van der Waals interactions were smoothly truncated by force switching from 9 to 10 Å.

## Supplementary Tables

Table S1:  $\beta_2$ AR covariance overlaps and Z-scores (n = 10,000) after individual parametrization.

| Resolution                | Connectivity                | Spring Function               | Z-score | Overlap |
|---------------------------|-----------------------------|-------------------------------|---------|---------|
| one-bead/<br>two-residues | Distance                    | Heaviside                     | 96.26   | 0.459   |
|                           |                             | Exponential                   | 94.81   | 0.481   |
|                           |                             | Power                         | 87.33   | 0.477   |
|                           |                             | HCA                           | 89.31   | 0.477   |
|                           | Bonds:<br>Non-bonded        | Constant:Exponential          | 95.80   | 0.481   |
|                           |                             | Constant:Power                | 84.49   | 0.46    |
|                           | Bonds:Angles:<br>Non-bonded | Constant:Constant:Exponential | 95.83   | 0.481   |
|                           | Constant:Constant:Power     | 84.39                         | 0.464   |         |
| one-bead/<br>residue      | Distance                    | Heaviside                     | 238.50  | 0.503   |
|                           |                             | Exponential                   | 205.82  | 0.545   |
|                           |                             | Power                         | 206.05  | 0.552   |
|                           |                             | HCA                           | 205.32  | 0.552   |
|                           | Bonds:<br>Non-bonded        | Constant:Exponential          | 204.24  | 0.545   |
|                           |                             | Constant:Power                | 206.95  | 0.552   |
|                           | Bonds:Angles:<br>Non-bonded | Constant:Constant:Exponential | 199.57  | 0.548   |
|                           | Constant:Constant:Power     | 206.38                        | 0.524   |         |
| two-beads/<br>residue     | Distance                    | Heaviside                     | 145.27  | 0.251   |
|                           |                             | Exponential                   | 179.17  | 0.275   |
|                           |                             | Power                         | 183.75  | 0.275   |
|                           |                             | HCA                           | 321.85  | 0.350   |
|                           | Bonds:<br>Non-bonded        | Constant:Exponential          | 181.92  | 0.276   |
|                           |                             | Constant:Power                | 188.95  | 0.275   |
|                           | Bonds:Angles:<br>Non-bonded | Constant:Constant:Exponential | 216.98  | 0.273   |
|                           | Constant:Constant:Power     | 225.66                        | 0.269   |         |

Table S2: rhodopsin covariance overlaps and Z-scores (n = 10,000) after individual parametrization.

| Resolution                  | Connectivity                  | Spring Function      | Z-score | Overlap |
|-----------------------------|-------------------------------|----------------------|---------|---------|
| one-bead/<br>two-residues   | Distance                      | Heaviside            | 73.46   | 0.381   |
|                             |                               | Exponential          | 77.30   | 0.406   |
|                             |                               | Power                | 70.60   | 0.412   |
|                             |                               | HCA                  | 71.72   | 0.414   |
|                             | Bonds:<br>Non-bonded          | Constant:Exponential | 72.79   | 0.409   |
|                             |                               | Constant:Power       | 69.59   | 0.400   |
| Bonds:Angles:<br>Non-bonded | Constant:Constant:Exponential | 75.11                | 0.409   |         |
|                             | Constant:Constant:Power       | 69.85                | 0.400   |         |
| one-bead/<br>residue        | Distance                      | Heaviside            | 192.94  | 0.414   |
|                             |                               | Exponential          | 168.60  | 0.457   |
|                             |                               | Power                | 165.15  | 0.467   |
|                             |                               | HCA                  | 163.83  | 0.468   |
|                             | Bonds:<br>Non-bonded          | Constant:Exponential | 158.02  | 0.457   |
|                             |                               | Constant:Power       | 162.12  | 0.465   |
| Bonds:Angles:<br>Non-bonded | Constant:Constant:Exponential | 157.27               | 0.459   |         |
|                             | Constant:Constant:Power       | 158.53               | 0.445   |         |
| two-beads/<br>residue       | Distance                      | Heaviside            | 345.15  | 0.367   |
|                             |                               | Exponential          | 319.74  | 0.394   |
|                             |                               | Power                | 312.13  | 0.394   |
|                             |                               | HCA                  | 315.39  | 0.394   |
|                             | Bonds:<br>Non-bonded          | Constant:Exponential | 312.12  | 0.394   |
|                             |                               | Constant:Power       | 307.45  | 0.393   |
| Bonds:Angles:<br>Non-bonded | Constant:Constant:Exponential | 338.12               | 0.383   |         |
|                             | Constant:Constant:Power       | 320.09               | 0.385   |         |

Table S3: CB2 covariance overlaps and Z-scores (n = 10,000) after individual parametrization.

| Resolution                  | Connectivity                  | Spring Function      | Z-score | Overlap |
|-----------------------------|-------------------------------|----------------------|---------|---------|
| one-bead/<br>two-residues   | Distance                      | Heaviside            | 87.69   | 0.414   |
|                             |                               | Exponential          | 91.71   | 0.449   |
|                             |                               | Power                | 83.47   | 0.450   |
|                             |                               | HCA                  | 89.31   | 0.436   |
|                             | Bonds:<br>Non-bonded          | Constant:Exponential | 88.61   | 0.451   |
|                             |                               | Constant:Power       | 81.97   | 0.438   |
| Bonds:Angles:<br>Non-bonded | Constant:Constant:Exponential | 84.17                | 0.442   |         |
|                             | Constant:Constant:Power       | 82.23                | 0.438   |         |
| one-bead/<br>residue        | Distance                      | Heaviside            | 194.58  | 0.407   |
|                             |                               | Exponential          | 182.01  | 0.472   |
|                             |                               | Power                | 168.17  | 0.490   |
|                             |                               | HCA                  | 169.95  | 0.490   |
|                             | Bonds:<br>Non-bonded          | Constant:Exponential | 182.91  | 0.472   |
|                             |                               | Constant:Power       | 167.41  | 0.490   |
| Bonds:Angles:<br>Non-bonded | Constant:Constant:Exponential | 175.79               | 0.480   |         |
|                             | Constant:Constant:Power       | 172.43               | 0.469   |         |
| two-beads/<br>residue       | Distance                      | Heaviside            | 355.10  | 0.377   |
|                             |                               | Exponential          | 327.10  | 0.408   |
|                             |                               | Power                | 325.17  | 0.416   |
|                             |                               | HCA                  | 319.13  | 0.417   |
|                             | Bonds:<br>Non-bonded          | Constant:Exponential | 327.95  | 0.414   |
|                             |                               | Constant:Power       | 326.84  | 0.416   |
| Bonds:Angles:<br>Non-bonded | Constant:Constant:Exponential | 375.64               | 0.415   |         |
|                             | Constant:Constant:Power       | 351.09               | 0.423   |         |

Table S4: Optimized spring parameters after fitting to all three trajectories simultaneously. All distance-based parameters are in angstroms and all other quantities are unitless.

| Resolution                | Connectivity                | Spring Function                                          | Parameters                                           |
|---------------------------|-----------------------------|----------------------------------------------------------|------------------------------------------------------|
| one-bead/<br>two-residues | Distance                    | Heaviside                                                | 13.93                                                |
|                           |                             | Exponential                                              | -0.60                                                |
|                           |                             | Power                                                    | -6.54                                                |
|                           |                             | HCA ( $R_c$ , a, b, c, d)                                | 3.68,<br>1944.5, 2675.36,<br>5.84296e+06, 6.60       |
|                           | Bonds:<br>Non-bonded        | Constant:Exponential<br>Constant:Power                   | 11.77 : -5.15<br>1.60 : -6.59                        |
|                           | Bonds:Angles:<br>Non-bonded | Constant:Constant:Exponential<br>Constant:Constant:Power | 106.7 : 59.7 : -0.52<br>30.84 : 8.68 : -6.48         |
| one-bead/<br>residue      | Distance                    | Heaviside                                                | 8.64                                                 |
|                           |                             | Exponential                                              | -1.06                                                |
|                           |                             | Power                                                    | -8.48                                                |
|                           |                             | HCA ( $R_c$ , a, b, c, d)                                | 2.91,<br>2089, 3076,<br>4.173e+06, 8.60              |
|                           | Bonds:<br>Non-bonded        | Constant:Exponential<br>Constant:Power                   | 9.77:-1.06<br>2.72:-8.56                             |
|                           | Bonds:Angles:<br>Non-bonded | Constant:Constant:Exponential<br>Constant:Constant:Power | 9.41 : 0.053 : -0.87<br>15.99 : 2.83 : -7.93         |
| two-beads/<br>residue     | Distance                    | Heaviside                                                | 8.63                                                 |
|                           |                             | Exponential                                              | -1.32                                                |
|                           |                             | Power                                                    | -9.01                                                |
|                           |                             | HCA ( $R_c$ , a, b, c, d)                                | 8.63,<br>3154.45, -1313.51,<br>5.87623e+06, 5.38     |
|                           | Bonds:<br>Non-bonded        | Constant:Exponential<br>Constant:Power                   | 0.30 : -1.19<br>8.52 : -8.84                         |
|                           | Bonds:Angles:<br>Non-bonded | Constant:Constant:Exponential<br>Constant:Constant:Power | 0.51 : 30.79 : -0.76<br>5.927e-04 : 4.47e-04 : -6.43 |



## References

1. Park, J. H.; Scheerer, P.; Hofmann, K. P.; Choe, H.-W.; Ernst, O. P. *Nature* **2008**, *454*, 183–187.
2. Phillips, J. C.; Braun, R.; Wang, W.; Gumbart, J.; Tajkhorshid, E.; Villa, E.; Chipot, C.; Skeel, R. D.; Kalé, L.; Schulten, K. *J. Comput. Chem.* **2005**, *26*, 1781–802.
3. Brooks, B.; Brucoleri, R.; Olafson, B.; States, D.; Swaminathan, S.; Karplus, M. *J. Comput. Chem.* **1983**, *4*, 187–217.
4. MacKerell, A. D., Jr.; Bashford, D.; Bellott, M.; Dunbrack Jr., R.; Evanseck, J.; Field, M.; Fischer, S.; Gao, J.; Guo, H.; Ha, S.; Joseph-McCarthy, D.; Kuchnir, L.; Kuczera, K.; Lau, F.; Mattos, C.; Michnick, S.; Ngo, T.; Nguyen, D.; Prodhom, B.; Reiher, W., III; Roux, B.; Schlenkrich, M.; Smith, J.; Stote, R.; Straub, J.; Watanabe, M.; Wiorcikiewicz-Kuczera, J.; Yin, D.; Karplus, M. *J. Phys. Chem. B* **1998**, *102*, 3586–3616.
5. Klauda, J. B.; Venable, R. M.; Freites, J. A.; O'Connor, J. W.; Tobias, D. J.; Mondragon-Ramirez, C.; Vorobyov, I.; MacKerell, A. D.; Pastor, R. W. *J. Phys. Chem. B* **2010**, *114*, 7830–7843.
6. Andersen, H. C. *J. Comput. Chem.* **1983**, *52*, 24–34.
7. Deserno, M.; Holm, C. *J. Chem. Phys.* **1998**, *109*, 7678.
8. Deserno, M.; Holm, C. *J. Chem. Phys.* **1998**, *109*, 7694.
9. Essmann, U.; Perera, L.; Berkowitz, M. L.; Darden, T.; Lee, H.; Pedersen, L. G. *J. Chem. Phys.* **1995**, *103*, 8577–8593.
